# Supplementary material for: The N-myristoylome of Trypanosoma cruzi
Source: PubMed Central journal article supplement (PMC4974623; doi:10.1038/srep31078), 2016-08-05
Supplement: srep31078-s1.pdf [file srep31078-s1.pdf]

## Supplementary Information

### **The *N*-myristoylome of *Trypanosoma cruzi***

**Adam J. Roberts and Alan H. Fairlamb \***

Division of Biological Chemistry and Drug Discovery, College of Life Sciences, University of  
Dundee, Dundee, DD1 5EH, UK

\* **Corresponding author:** Email [a.h.fairlamb@dundee.ac.uk](mailto:a.h.fairlamb@dundee.ac.uk). Tel: 01382 385 155 Fax: 01382  
385 542

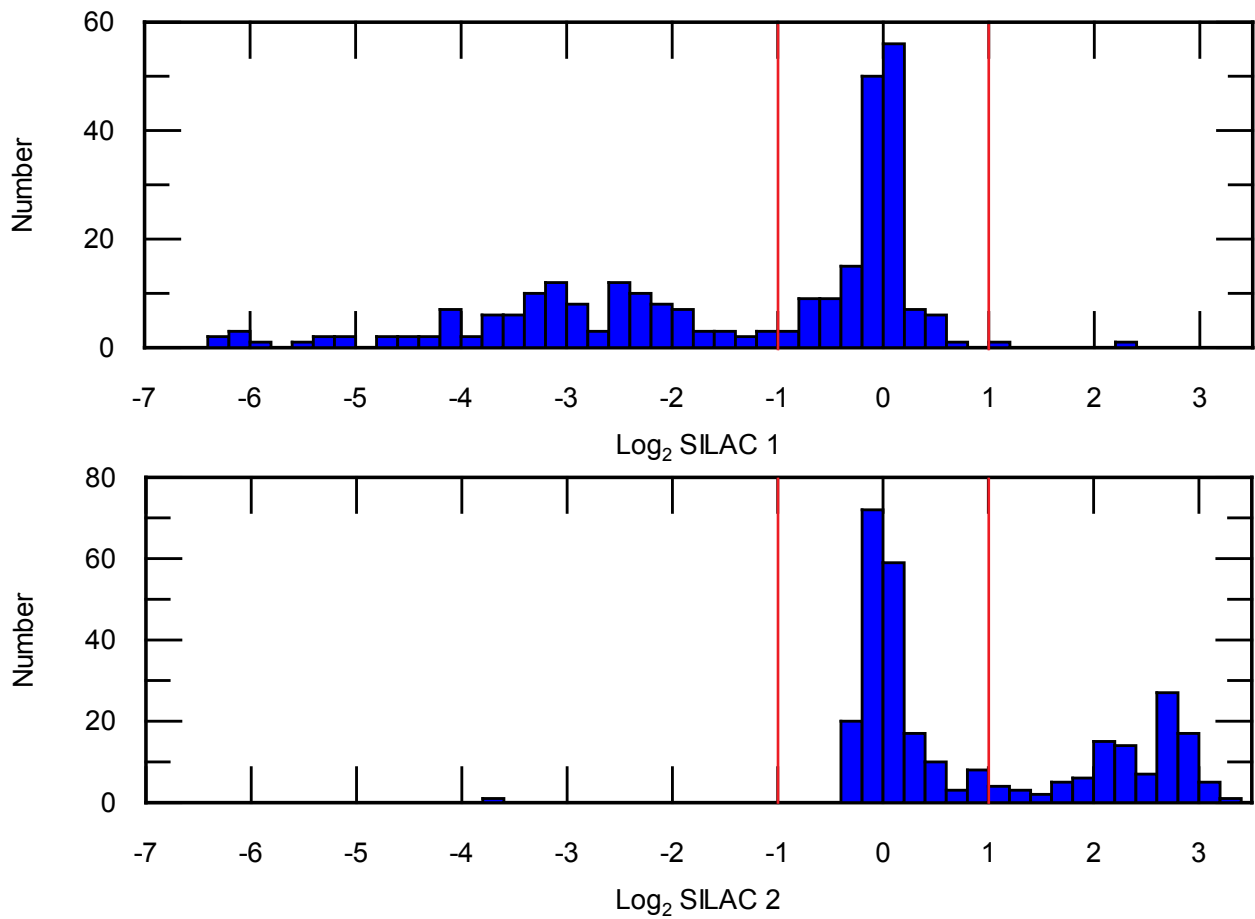

**Figure S1 Histogram plots of the Log<sub>2</sub> transformed SILAC ratios for experiments 1 and 2.**

AzMyr was used to label the isotopically light parasites in experiment 1 and the heavy parasites in experiment 2. Log<sub>2</sub> H/L ratios were normalised to the mode value and plotted on the x axis, with the frequency on the y axis. Arbitrary cut-off boundaries for enrichment are marked by the red lines.

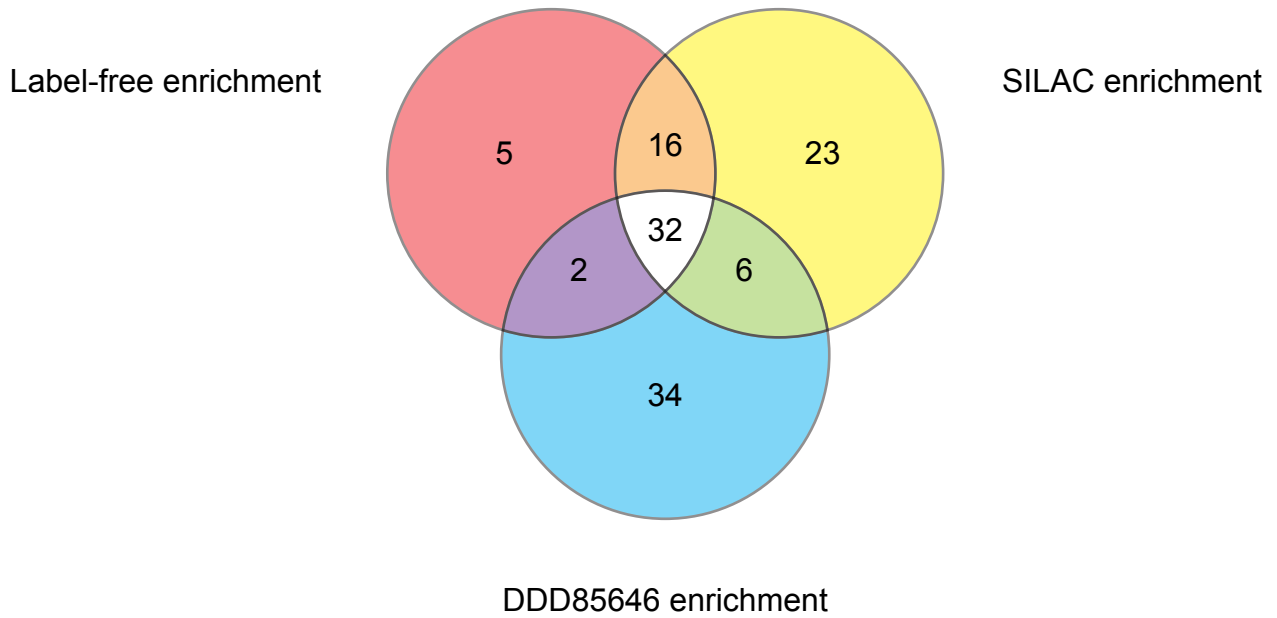

**Figure S2 Venn diagram showing the enrichment of proteins from the three experimental approaches.**

A total of 32 proteins were identified in all three experiments, with all annotated or predicted to have an N-terminal MG. 56 proteins were identified in at least 2 experiments with the majority predicted to have the N-terminal MG, required for *N*-myristoylation.

**Table S1** List of protein groups and peptides identified in label-free, SILAC enrichment and DDD85646 experiments. Data is provided as an .xls file.

**Table S2** List of proteins enriched in label-free experiments (LFQ) and or SILAC experiments. Data is provided as an .xls file.

| UniProt | Score  | Sequence                        | Experiment | Annotated Ms/Ms spectra                                                                             |
|---------|--------|---------------------------------|------------|-----------------------------------------------------------------------------------------------------|
| P60712  | 179.67 | DSYVGDEAQSQR                    | SILAC 1    | <p>Raw file: Polymyxin-Silac-1, Scan 4080, Method ITMS, CID 179.67, Score 1353.62, Mass 1353.62</p> |
| K4DKJ6  | 106.04 | MLQQLQNMR                       | SILAC 1    | <p>Raw file: Polymyxin-Silac-1, Scan 4118, Method ITMS, CID 106.04, Score 1160.58, Mass 1160.58</p> |
| Q4E0K3  | 46.663 | AMMVLLR                         | SILAC 2    | <p>Raw file: Polymyxin-Silac-2, Scan 4015, Method ITMS, CID 46.66, Score 832.47, Mass 832.47</p>    |
| Q4E2S5  | 5.6511 | HLGQVMEAYVSGEHSISSNGSPLNLSK     | SILAC 2    | <p>Raw file: Polymyxin-Silac-2, Scan 7075, Method ITMS, CID 5.65, Score 2927.41, Mass 2927.41</p>   |
| K4EBF6  | 1.855  | QYYQLADWVVLVEVCTTQPPITETWVQSVDK | SILAC 2    | <p>Raw file: Polymyxin-Silac-2, Scan 24720, Method ITMS, CID 1.86, Score 3722.83, Mass 3722.83</p>  |
| Q4CX61  | 15.667 | YPCLPEEPAPGVAIVEVGLMEDPVFR      | SILAC 2    | <p>Raw file: Polymyxin-Silac-2, Scan 18605, Method ITMS, CID 15.67, Score 2883.42, Mass 2883.42</p> |

**Table S3** List of peptides identified in polymyxin acylase experiments with their corresponding MaxQuant peptide scores.

**Table S4** Enrichment of the *N*-myristoylome from parasites treated with DDD85646. Data is provided as an .xls file.

**Table S5** Functional analysis of consistently enriched proteins. Data is provided as an .xls file.

| UniProt Accession | NMT Eukaryota |               | Myristoylator     |
|-------------------|---------------|---------------|-------------------|
| K4DJS2            | RELIABLE      | RELIABLE      | High Confidence   |
| K4DQN8            | TWILIGHT ZONE | TWILIGHT ZONE | Not myristoylated |
| K4DT87            | RELIABLE      | RELIABLE      | High Confidence   |
| K4DTB6            | NO            | NO            | High Confidence   |
| K4DTI6            | NO            | NO            | High Confidence   |
| K4DTV5            | TWILIGHT ZONE | TWILIGHT ZONE | High Confidence   |
| K4DUN8            | RELIABLE      | RELIABLE      | High Confidence   |
| K4DV27            | NO            | NO            | High Confidence   |
| K4DVI8            | RELIABLE      | TWILIGHT ZONE | Medium Confidence |
| K4DWF7            | RELIABLE      | RELIABLE      | High Confidence   |
| K4DWR5            | RELIABLE      | TWILIGHT ZONE | High Confidence   |
| K4DX27            | NO            | NO            | Not myristoylated |
| K4DXD3            | NO            | NO            | Not myristoylated |
| K4DXT8            | TWILIGHT ZONE | NO            | High Confidence   |
| K4DZS1            | RELIABLE      | RELIABLE      | Medium Confidence |
| K4E189            | NO            | NO            | Not myristoylated |
| K4E1X7            | RELIABLE      | TWILIGHT ZONE | High Confidence   |
| K4E3U8            | RELIABLE      | RELIABLE      | High Confidence   |
| K4E3X3            | NO            | NO            | Not myristoylated |
| K4E583            | NO            | NO            | High Confidence   |
| K4E595            | RELIABLE      | RELIABLE      | High Confidence   |
| K4E5N2            | RELIABLE      | RELIABLE      | High Confidence   |
| K4E5P0            | TWILIGHT ZONE | RELIABLE      | High Confidence   |
| K4E5Y1            | RELIABLE      | RELIABLE      | High Confidence   |
| K4E6H0            | NO            | NO            | High Confidence   |
| K4E6H6            | TWILIGHT ZONE | NO            | Medium Confidence |
| K4E818            | RELIABLE      | RELIABLE      | High Confidence   |
| K4E8V8            | RELIABLE      | RELIABLE      | High Confidence   |
| K4E943            | RELIABLE      | TWILIGHT ZONE | High Confidence   |
| K4E955            | RELIABLE      | RELIABLE      | High Confidence   |
| K4EC97            | RELIABLE      | RELIABLE      | Not myristoylated |
| K4EE92            | RELIABLE      | NO            | Not myristoylated |
| K4EEE5            | RELIABLE      | RELIABLE      | High Confidence   |
| Q4CV42            | RELIABLE      | RELIABLE      | High Confidence   |
| Q4CW64            | RELIABLE      | RELIABLE      | High Confidence   |
| Q4CZT4            | RELIABLE      | RELIABLE      | Low Confidence    |
| Q4D0B9            | NO            | NO            | Low Confidence    |
| Q4D708            | RELIABLE      | RELIABLE      | High Confidence   |
| Q4D7Y8            | NO            | NO            | High Confidence   |
| Q4DDD2            | RELIABLE      | RELIABLE      | High Confidence   |
| Q4DLX6            | TWILIGHT ZONE | NO            | Not myristoylated |
| Q4DPA5            | RELIABLE      | RELIABLE      | High Confidence   |
| Q4DPJ1            | NO            | NO            | High Confidence   |
| Q4DRI6            | TWILIGHT ZONE | TWILIGHT ZONE | High Confidence   |
| Q4DVL2            | TWILIGHT ZONE | TWILIGHT ZONE | Not myristoylated |
| Q4DXG4            | TWILIGHT ZONE | TWILIGHT ZONE | Not myristoylated |
| Q4DZM9            | TWILIGHT ZONE | TWILIGHT ZONE | Medium Confidence |
| Q4E2Z0            | RELIABLE      | NO            | Low Confidence    |
| Q4E4N2            | NO            | NO            | Not myristoylated |
| K4DQW3            | NO            | NO            | Not myristoylated |
| K4DYH4            | No MG         | No MG         | No MG             |
| K4EOJ9            | No MG         | No MG         | No MG             |
| K4EOP3            | No MG         | No MG         | No MG             |
| K4E8Y0            | No MG         | No MG         | No MG             |
| Q4CWV8            | No MG         | No MG         | No MG             |
| Q4DEA8            | No MG         | No MG         | No MG             |

**Table S6** Prediction of N-myristoylation using Myristoylator and the NMT Myr predictor with the eukaryota (without fungi) or fungi-specific settings. Low and medium confidence predictions in Myristoylator were assigned the same significance as the twilight zone predictions from the NMT predictor.

**Table S7.** Identifying orthologs of *N*-myristoylated proteins from similar enrichments from *Plasmodium falciparum* and *Leishmania major*. Data is provided as an .xls file.
